# Supplementary material for: Future paper based printed circuit boards for green electronics: fabrication and life cycle assessment
Source: Royal Society of Chemistry journal article supplement (doi:10.1039/c4ee01995d), 2014-01-01
Supplement: c4ee01995d2.pdf [file c4ee01995d2.pdf]

## Electronic Supplementary Information

# Future Paper based Printed Circuit Boards for Green Electronics: Fabrication and Life Cycle Assessment

## Content

|                                                                                                                                                                                                                                                                                                                                                  |   |
|--------------------------------------------------------------------------------------------------------------------------------------------------------------------------------------------------------------------------------------------------------------------------------------------------------------------------------------------------|---|
| <b>Mechanical property</b> .....                                                                                                                                                                                                                                                                                                                 | 3 |
| <b>Table S1</b> the mechanical property of paper. ....                                                                                                                                                                                                                                                                                           | 3 |
| <b>Conductivity and stability of the printed circuits</b> .....                                                                                                                                                                                                                                                                                  | 4 |
| <b>Figure S2</b> SEM image of cross section of printed ECA conductive line. ....                                                                                                                                                                                                                                                                 | 4 |
| <b>Figure S3</b> Optical images of the cross-sectional images showing the junctions of three-layered, five-layered and ten-layered P-PCB. a) A through-via of a three-layered P-PCB. b) A blind-via of a three-layered P-PCB. c) A through-via of a five-layered P-PCB. d) a through-via of a ten-layered P-PCB. The scale bars are 0.5 mm. .... | 4 |
| <b>Figure S4</b> the adhesive test of P-PCB. The tests were conducted on two different samples, only some paper scrape was attached to the tape. ....                                                                                                                                                                                            | 5 |
| <b>Figure S5</b> Variation of bulk resistivity versus rolling cycles. d refers to the curvature diameter. ....                                                                                                                                                                                                                                   | 6 |
| <b>Figure S6</b> Variation of bulk resistivity versus aging time, the printed ECA samples (50wt% Ag content) were kept at 85 °C/85RH for more than 1500 hours.....                                                                                                                                                                               | 6 |
| <b>Prototyping</b> .....                                                                                                                                                                                                                                                                                                                         | 7 |
| <b>Figure S7</b> prototype of a three-layered P-PCB: the twinkle “THU”. The scale bar is 10 mm. ....                                                                                                                                                                                                                                             | 7 |
| <b>Figure S8</b> A prototype of doorbell assembled on a three-layered P-PCB. The scale bar is 10mm. ....                                                                                                                                                                                                                                         | 8 |
| <b>Figure S9</b> The control panel of a temperature controller. The scale bar is 10mm. ....                                                                                                                                                                                                                                                      | 8 |
| <b>Life cycle assessment</b> .....                                                                                                                                                                                                                                                                                                               | 9 |
| <b>Table S2</b> material inventory of inputs and outputs of 4-layered paper based PCB (10000 m <sup>2</sup> ) .....                                                                                                                                                                                                                              | 9 |

|                                                                                                                                                   |    |
|---------------------------------------------------------------------------------------------------------------------------------------------------|----|
| <b>Table S3</b> Ecoinvent inputs inventory of P-PCB g/m <sup>2</sup> (resources).....                                                             | 10 |
| <b>Table S4</b> Material inventory of inputs of epoxy based PCB .....                                                                             | 10 |
| <b>Table S5</b> Material inventory of outputs of epoxy based PCB .....                                                                            | 11 |
| <b>Table S6</b> Ecoinvent inputs inventory of epoxy based PCB g/m <sup>2</sup> (resources).....                                                   | 11 |
| <b>Table S7</b> Contents of the discharged waste water after treatment (550kg/m <sup>2</sup> ).....                                               | 12 |
| <b>Table S8</b> Treatment of the waste epoxy based PCB.....                                                                                       | 12 |
| <b>iii. Environmental profiles for the life cycle of P-PCB</b> .....                                                                              | 12 |
| <b>Table S9</b> The contribution to the environmental impact categories of different raw materials in P-PCB fabrication .....                     | 12 |
| <b>Figure S10</b> Environmental profile of O-PCB. The main raw materials and consumptions in the manufacture of epoxy based PCB are listed. ....  | 13 |
| <b>Table S10</b> The contribution to the environmental impacts categories of different raw materials of epoxy based PCB .....                     | 14 |
| <b>Figure S11</b> A Chinese woman manually heated up a computer main board to remove chips. 2010, Guiyu, China. (Copyright: Jeffrey Lau/IPS)..... | 15 |
| <b>v. Cost estimation of the paper based PCB.</b> .....                                                                                           | 15 |
| <b>Table S11</b> Paper based PCB(4 layers&10000m <sup>2</sup> ) production cost estimation. ....                                                  | 15 |

## Mechanical property

Adequate mechanical strength of a substrate material is a basic requirement to maintain integrity and protect the electronic components. The printing paper with sticker on the back (Avery Dennison Co. America, FASSON series, AW5416) was chosen as a motif for this study. The tested samples were of 10 mm in width and 50 mm in length, and they were dried at 80 °C for 1h before being stretched on an electromechanical universal testing machine (SANS CMT 6104) with the crosshead moving speed of 2 mm/min. The test results are shown in Table S1 and Figure S1.

**Table S1** the mechanical property of paper.

| Sample        | Tensile failure stress (MPa) | Tensile stress (MPa) | Tensile yield stress (MPa) |
|---------------|------------------------------|----------------------|----------------------------|
| Single layer  | 4.57                         | 4.59                 | 4.43                       |
| Double layers | 5.95                         | 6.60                 | 6.60                       |
| Three layers  | 5.21                         | 5.97                 | 5.97                       |

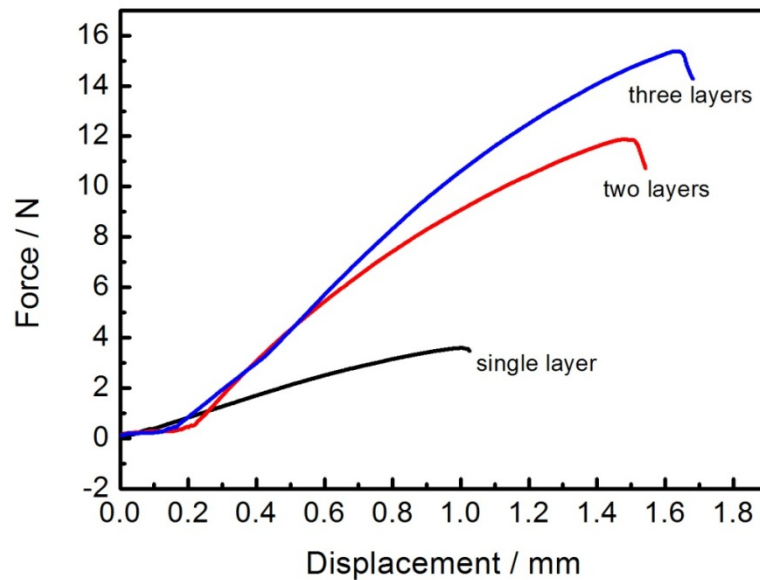

**Figure S1** the tensile force versus displacement of single layer, two layers and three layers printing paper

## Conductivity and stability of the printed circuits

The PU based ECA with 50 wt% of silver filler loading showed an electrical conductivity of  $\sim 1 \times 10^{-5}$  Ohm·cm after being cured at 150°C, indicating a promising application for conductive circuits. Higher silver content would improve the electrical conductivity, yet it would also cause a higher viscosity of the paste which may not be suitable for screen printing. The electrical conductivity was tested with a four point probe method (LORESTA-GP MCP-T610).

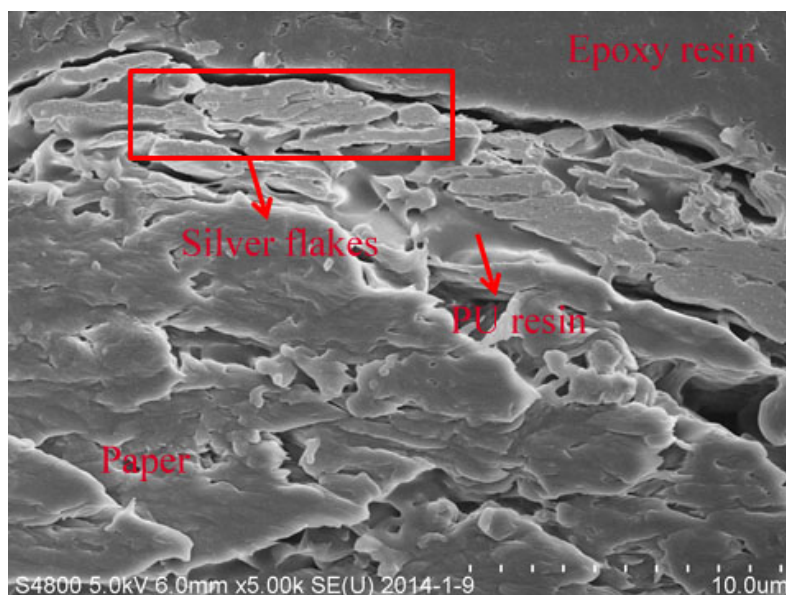

**Figure S2** SEM image of cross section of printed ECA conductive line.

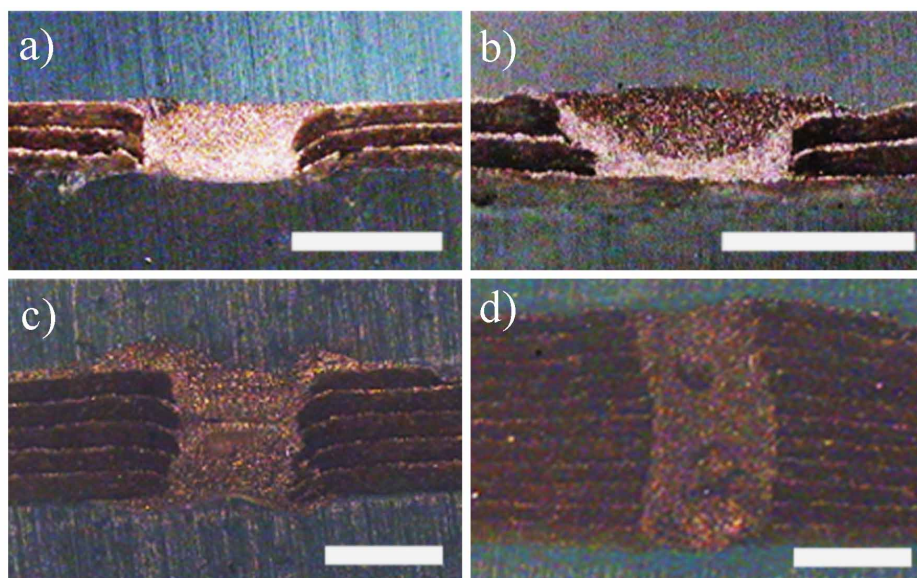

**Figure S3** Optical images of the cross-sectional images showing the junctions of three-layered, five-layered and ten-layered P-PCB. a) A through-via of a three-layered P-PCB. b) A blind-via of a three-layered P-PCB. c) A through-via of a five-layered P-PCB. d) a through-via of a ten-layered P-PCB. The scale bars are 0.5 mm.

The screen printed conductive track was only 4~5 $\mu$ m thick (Figure S2), which is close to the electroplated copper layer for the O-PCB. It can be observed under SEM that the silver flakes arrange closely after being cured and this results in an improved electrical conductivity, which is

related to the capillary property of the porous paper substrate. The SEM sample was prepared with a hot mounting press (STRUERS Labopress-3), after being sawed in half and the cross section was smoothed with a blade.

The situation of the inter-layer connections is one of the most important issues for a multi-layer PCB. We filled ECA in the vertical interconnect access (via) that were mechanically punched or drilled to connect different layers. The key factor for the connection is aligning the junction points on each layer; and thus we tailored a position-alignment setup to achieve this. The samples for optical microscope were prepared with a hot mounting press (STRUERS Labopress-3) and the cross-sectional images are shown in Figure S3. As can be seen, the ECA filled in the vias connects well with each layer and the silver flakes were dispersed uniformly. Attempts have been made to construct five to ten layers of printed circuits (Figure S3 c and d); the cross-sectional view shows good connection of different layers, which means it is possible to fabricate up to ten-layers of the PCB with paper, indicating more complicated circuits and broader applications of the paper based PCB.

In addition to the simple and feasible fabrication process, reliable functional performance is very important to paper based PCB in practical uses. We tested the paper based PCB referring to the standard of ICP-6013.

#### **i. Adhesion test (ICP-6013-3.3.6)**

We conducted the tape test in accordance with ICP-TM-650, method 2.4.1. From Figure S4 we can see that of the tested samples, the conductive pattern remains intact and unnoticeable ECA material could be removed by the tape. This can be ascribed to the excellent mechanical strength of the PU-based ECA and the excellent bonding towards the paper substrate.

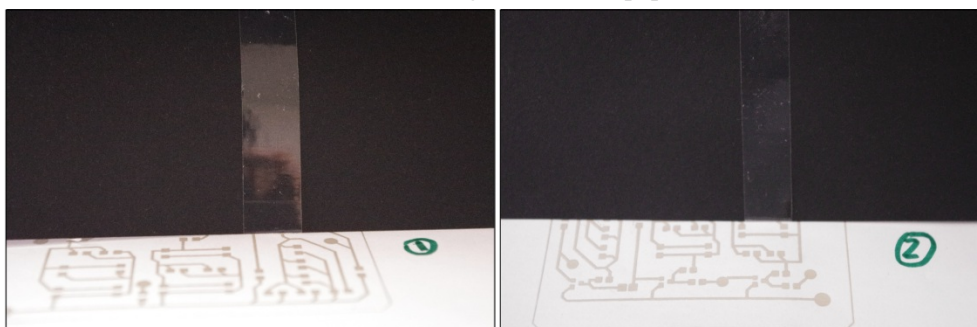

**Figure S4** the adhesive test of P-PCB. The tests were conducted on two different samples, only some paper scrape was attached to the tape.

#### **ii. Flexibility test (ICP-6013-3.6.2)**

Paper based conductive circuits can be folded and still maintain high conductivity. We rolled the printed circuits at different curvature diameters for 1000 times respectively. Figure S5 shows the volume resistivity change versus rolling cycles. The resistance increased with rolling cycles, and when the diameter was smaller, the resistance increased more because of more severe deformation. The bulk resistivity of the tested samples still maintained at  $2\sim3\times10^{-5} \Omega\cdot\text{cm}$  after 1000 cycles at the smallest folding diameter.

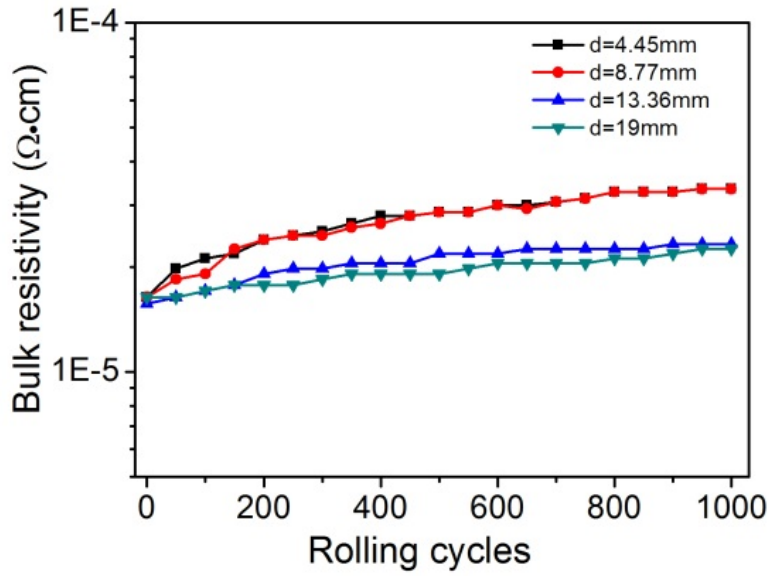

**Figure S5** Variation of bulk resistivity versus rolling cycles. d refers to the curvature diameter.

### iii. 85 °C /85RH reliability test

The tested conductive lines were of 0.5mm width and 20mm length. After being exposed in an 85 °C/85RH chamber for 1500 hours, the bulk resistivity still remained at  $1.6 \times 10^{-5} \Omega \cdot \text{cm}$  (Ag content in the ECA was 50wt%).

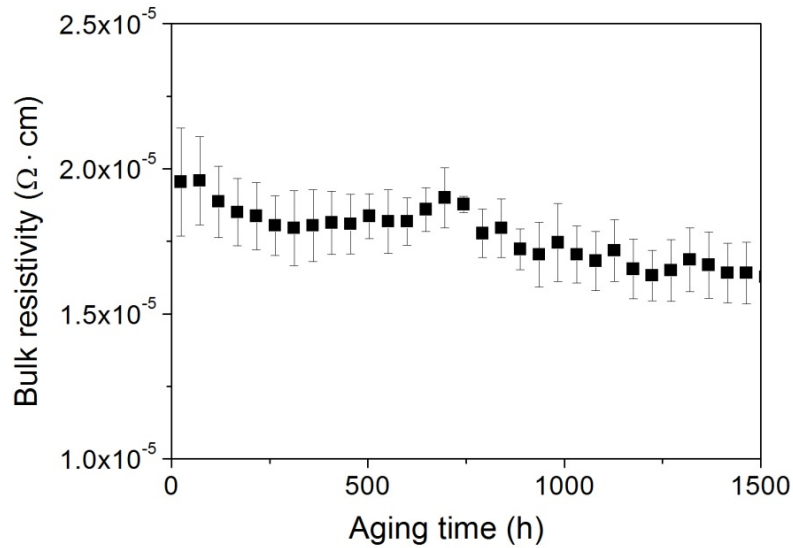

**Figure S6** Variation of bulk resistivity versus aging time, the printed ECA samples (50wt% Ag content) were kept at 85 °C/85RH for more than 1500 hours.

## Prototyping

Here we evaluate the feasibility of P-PCB in device applications:

### i. Twinkling LED array

A complete circuit mounted with relevant electrical components is the most basic application of printed circuits. We fabricated a twinkling “THU” (Capital letters for “Tsinghua University”) LED array (Figure S7) by mounting LED chips, resistors, capacitors and transistors on the surface of a three-layered P-PCB. The conductive lines (width = 0.5 mm, thickness = 3  $\mu\text{m}$ ) were printed with PU based ECA (50 wt% Ag loading), and cured at 150  $^{\circ}\text{C}$  (30 min). The adhesive we used to bond the electrical components on the circuits was the epoxy based ECA, because epoxy based ECA can be cured at a low temperature (40 $^{\circ}\text{C}$  15min). The names and types of the electrical components were labelled aside, which were ink printed previously. Paper based PCB is flexible and can be potentially pasted on surface of wall, bottles, boxes etc. for temporary decoration or integrated in protection suit, bandage or other short-term used wearable devices for reminding, sensing, warning etc.

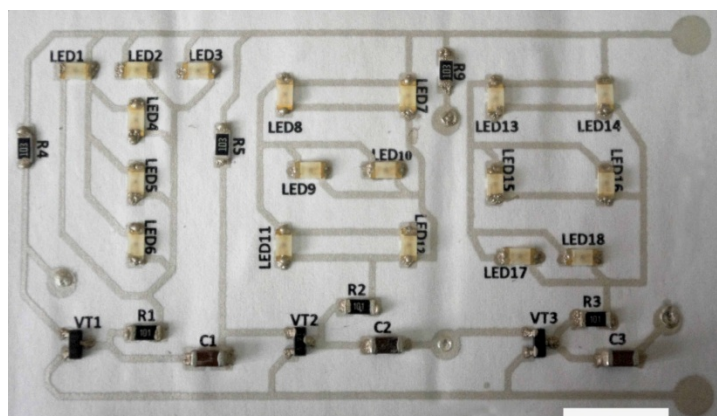

**Figure S7** prototype of a three-layered P-PCB: the twinkle “THU”. The scale bar is 10 mm.

### ii. Doorbell

The paper based PCB can also be applied in some simple and low cost household appliance. For example, we prototyped a doorbell with the paper based PCB. It is powered with a button cell and the buzzer rings when pressing the switch. The paper based PCB is thin and flexible. It can be pasted on many rigid substrate and still maintain functionality, e.g. curving walls or gatepost. The good processing property makes it facile to assembling and packaging, indicating a potential in low cost consumer electronics.



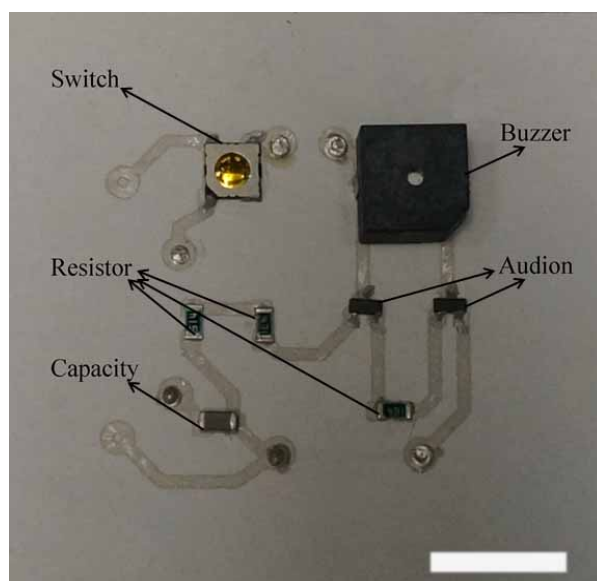

**Figure S8** A prototype of doorbell assembled on a three-layered P-PCB. The scale bar is 10mm.

### iii. Control panel

We replace the control panel of a temperature controller using the P-PCB. It can provide support for the ICs, switches, resistors, LEDs, capacitors, transistors, a buzzer and a LED digital display. It works just as well as the original epoxy based organic substrate that it replaces.

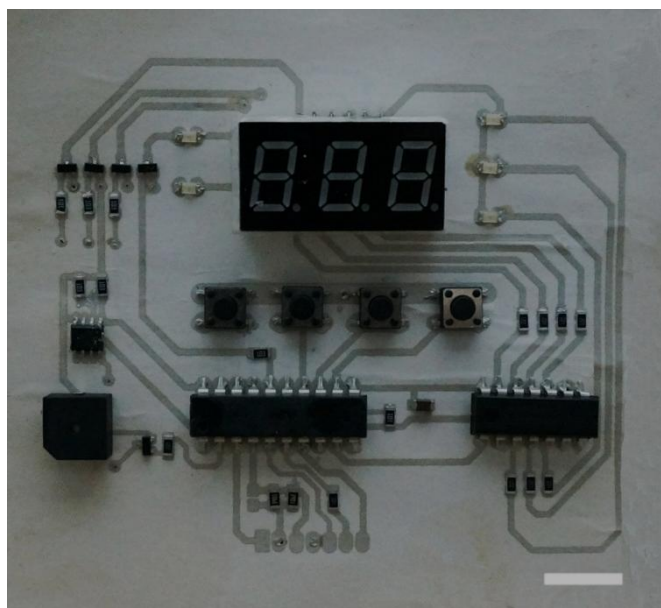

**Figure S9** The control panel of a temperature controller. The scale bar is 10mm.



## Life cycle assessment

### i. P-PCB

The inventory data and data source of P-PCB are listed in Table S2. The paper we use is of 80 g/m<sup>2</sup>. The mass of the ECA is calculated with the following equation:  $M = \text{area} \times \text{height} \times \text{density}$ , of which area=20000 m<sup>2</sup> (half of the 4-layered P-PCB), height=5μm and density= $2.06 \times 10^3$  kg/m<sup>3</sup> (measured with water displacement method).

**Table S2** material inventory of inputs and outputs of 4-layered paper based PCB (10000 m<sup>2</sup>)

| Inputs of 10000m <sup>2</sup> Paper based PCB(raw materials and energy) |                   |                   |                                                                                                                                |                                                                      |                         |             |                                          |
|-------------------------------------------------------------------------|-------------------|-------------------|--------------------------------------------------------------------------------------------------------------------------------|----------------------------------------------------------------------|-------------------------|-------------|------------------------------------------|
|                                                                         | Primary materials | Consumption       | Secondary materials                                                                                                            | Consumption                                                          | Third grade materials   | Consumption | Data source                              |
| Paper                                                                   | Paper             | 3200kg            |                                                                                                                                |                                                                      |                         |             | Lab                                      |
| ECA                                                                     | Resin (polyester) | 103kg             |                                                                                                                                |                                                                      |                         |             | Lab                                      |
|                                                                         | Silver flakes     | 103kg             | AgNO <sub>3</sub>                                                                                                              | 162kg                                                                | Ag                      | 103kg       | Shenzhen Hangsheng Electronics Co., Ltd. |
|                                                                         |                   |                   |                                                                                                                                |                                                                      | HNO <sub>3</sub> (50 %) | 120kg       |                                          |
|                                                                         |                   |                   | Ethanol                                                                                                                        | 103kg                                                                |                         |             |                                          |
|                                                                         |                   |                   | water                                                                                                                          | 1030kg                                                               |                         |             |                                          |
|                                                                         |                   |                   | NaOH50%                                                                                                                        | 38.1kg                                                               |                         |             |                                          |
|                                                                         |                   |                   | Formaldehyde                                                                                                                   | 14.3kg                                                               |                         |             |                                          |
| Glue                                                                    | Glue              | 240kg             |                                                                                                                                |                                                                      |                         |             | Lab                                      |
| Power                                                                   | Electricity       | 2670kwh           | 824kwh for silver flake production, 1336.73kwh for screen printing397kwh for drilling and curing,111.7kwh for waste treatment. |                                                                      |                         |             | Lab and reference                        |
| Outputs / 10000m <sup>2</sup> paper based PCB                           |                   |                   |                                                                                                                                |                                                                      |                         |             |                                          |
| 4-layered paper based PCB/3640kg                                        |                   |                   | = 3200kg paper + 206kgECA + 240kg glue                                                                                         |                                                                      |                         |             |                                          |
| Wastes                                                                  |                   |                   | waste paper                                                                                                                    |                                                                      |                         |             |                                          |
| Treatment of waste P-PCB                                                |                   |                   |                                                                                                                                |                                                                      |                         |             |                                          |
| Components                                                              |                   | Treatment         |                                                                                                                                | Remarks                                                              |                         |             |                                          |
| Paper                                                                   |                   | 50% incineration  |                                                                                                                                | Calorific value is 15MJ/kg, electricity generating efficiency is 24% |                         |             |                                          |
|                                                                         |                   | 30% recycle       |                                                                                                                                | Paper pulp                                                           |                         |             |                                          |
|                                                                         |                   | 20% landfill      |                                                                                                                                | Waste disposal                                                       |                         |             |                                          |
| Silver                                                                  |                   | 98% recycle       |                                                                                                                                |                                                                      |                         |             |                                          |
| Resin                                                                   |                   | 100% incineration |                                                                                                                                |                                                                      |                         |             |                                          |

**Table S3** Ecoinvent inputs inventory of P-PCB g/m<sup>2</sup> (resources)

| <b>Nonrenewable energy resources</b> |          |                               |          |
|--------------------------------------|----------|-------------------------------|----------|
| <b>Crude oil</b>                     | 6.03E+01 | <b>Lignite</b>                | 6.33E+01 |
| <b>Hard coal</b>                     | 6.89E+01 | <b>Uranium</b>                | 1.95E-03 |
| <b>Renewable energy resources</b>    |          |                               |          |
| <b>Primary forest</b>                | 6.24E-03 | <b>Wood, forest, standing</b> | 2.01E-01 |
| <b>Wood, hard, standing</b>          | 1.79E+02 | <b>Wood, soft, standing</b>   | 7.48E-04 |
| <b>Nonrenewable elements</b>         |          |                               |          |
| <b>Aluminium</b>                     | 2.65E-01 | <b>Lithium</b>                | 4.61E-06 |
| <b>Chromium</b>                      | 1.41E-01 | <b>Magnesium</b>              | 2.35E-05 |
| <b>Copper</b>                        | 3.01E-01 | <b>Manganese</b>              | 1.71E-02 |
| <b>Fluorine</b>                      | 3.68E-02 | <b>Molybdenum</b>             | 2.25E-02 |
| <b>Gallium</b>                       | 6.52E-10 | <b>Nickel</b>                 | 3.49E-01 |
| <b>Gold</b>                          | 7.37E-06 | <b>Palladium</b>              | 3.93E-07 |
| <b>Indium</b>                        | 1.95E-06 | <b>Phosphorus</b>             | 8.92E-01 |
| <b>Iodine</b>                        | 2.35E-04 | <b>Silver</b>                 | 2.06E-01 |
| <b>Iron</b>                          | 4.32E+00 | <b>Sulphur</b>                | 1.45E-02 |
| <b>Lead</b>                          | 5.38E-03 | <b>Tantalum</b>               | 7.18E-06 |
| <b>Non-renewable resources</b>       |          |                               |          |
| <b>Barium sulphate</b>               | 2.21E-01 | <b>Fluorspar</b>              | 4.78E-01 |
| <b>Borax</b>                         | 2.58E-06 | <b>Limestone</b>              | 5.22E+01 |
| <b>Clay</b>                          | 5.19E+00 |                               |          |
| <b>Renewable resources</b>           |          |                               |          |
| <b>Water</b>                         | 3.76E+04 | <b>Carbon dioxide</b>         | 7.21E+02 |

ii. **O-PCB**

The inventory data of epoxy based PCB is mainly obtained from Shennan circuits Co., Ltd.

**Table S4** Material inventory of inputs of epoxy based PCB

| <b>Inputs/10000m<sup>2</sup> Epoxy PCB</b>   |                     |                                      |                     |
|----------------------------------------------|---------------------|--------------------------------------|---------------------|
| <b>Materials</b>                             | <b>Quantity</b>     | <b>Materials</b>                     | <b>Quantity</b>     |
| <b>Copper foil</b>                           | 12500kg             | <b>CuCl<sub>2</sub></b>              | 260kg               |
| <b>Silica sand</b>                           | 2500kg              | <b>Kraft paper</b>                   | 10000m <sup>2</sup> |
| <b>Glass fiber</b>                           | 7500kg              | <b>Al plate</b>                      | 10000m <sup>2</sup> |
| <b>Epoxy resin</b>                           | 5500kg              | <b>KMnO<sub>4</sub></b>              | 200kg               |
| <b>Dry film</b>                              | 40000m <sup>2</sup> | <b>Copper</b>                        | 4500kg              |
| <b>Abrasive(Al<sub>2</sub>O<sub>3</sub>)</b> | 1000kg              | <b>NaOH</b>                          | 500kg               |
| <b>NaCo<sub>3</sub></b>                      | 3000kg              | <b>NH<sub>4</sub>HSO<sub>4</sub></b> | 100kg               |
| <b>NaHSO<sub>4</sub></b>                     | 100kg               | <b>Tin</b>                           | 300kg               |
| <b>KAu(CN)<sub>4</sub></b>                   | 2kg                 | <b>DI water</b>                      | 100000kg            |
| <b>Power</b>                                 | 200000kwh           | <b>Tap water</b>                     | 11000000kg          |

**Table S5** Material inventory of outputs of epoxy based PCB

| <b>Outputs of fabricating 10000m<sup>2</sup> epoxy based PCB</b>         |                         |                                                             |                                                          |                                                                                                       |
|--------------------------------------------------------------------------|-------------------------|-------------------------------------------------------------|----------------------------------------------------------|-------------------------------------------------------------------------------------------------------|
| <b>PCB/10000m<sup>2</sup></b>                                            |                         | <b>Components and proportion</b>                            |                                                          |                                                                                                       |
| 26.75t                                                                   |                         | =15t epoxy board + 10.75t Cu + 0.5t ink + 0.5t other metals |                                                          |                                                                                                       |
| <b>Wastes emission in fabricating 10000m<sup>2</sup> epoxy based PCB</b> |                         |                                                             |                                                          | <b>Remarks</b>                                                                                        |
| <b>Wastes</b>                                                            | <b>Resources</b>        | <b>Proportion</b>                                           | <b>Treatment</b>                                         | The Cu in the etching effluent is about 7t and was recovered from the waste in the treatment process. |
| Waste liquid                                                             | Cleaning effluent       | 90%/9900t                                                   | 50% for reuse and the rest is discharged after treatment |                                                                                                       |
|                                                                          | Etching effluent        | 5%/550t                                                     | discharged after treatment                               |                                                                                                       |
|                                                                          | Electroplating effluent | 0.01%                                                       | discharged after treatment                               |                                                                                                       |
|                                                                          | Others                  | 5%/550t                                                     | discharged after treatment                               |                                                                                                       |
| <b>Waste residue</b>                                                     | Fabrication process     | 5t                                                          | Treat as industrial waste                                |                                                                                                       |
| <b>Waste gas</b>                                                         | Ignored                 |                                                             |                                                          |                                                                                                       |

**Table S6** Ecoinvent inputs inventory of epoxy based PCB g/m<sup>2</sup>(resources)

| <b>Nonrenewable energy resources</b>      |          |                               |          |
|-------------------------------------------|----------|-------------------------------|----------|
| <b>Crude oil</b>                          | 2.56E+03 | <b>Lignite</b>                | 4.05E+03 |
| <b>Hard coal</b>                          | 8.04E+03 | <b>Uranium</b>                | 1.87E-01 |
| <b>Renewable energy resources</b>         |          |                               |          |
| <b>Primary forest</b>                     | 1.09E+00 | <b>Wood, forest, standing</b> | 1.30E+00 |
| <b>Wood, hard, standing</b>               | 1.18E+02 | <b>Wood, soft, standing</b>   | 1.12E-02 |
| <b>Nonrenewable elements</b>              |          |                               |          |
| <b>Aluminium</b>                          | 8.68E+02 | <b>Lead</b>                   | 2.03E+01 |
| <b>Chromium</b>                           | 1.34E+01 | <b>Manganese</b>              | 8.58E+00 |
| <b>Copper</b>                             | 4.07E+02 | <b>Molybdenum</b>             | 5.38E+00 |
| <b>Fluorine</b>                           | 1.96E-01 | <b>Nickel</b>                 | 3.23E+01 |
| <b>Gallium</b>                            | 5.41E-08 | <b>Silver</b>                 | 2.45E+00 |
| <b>Gold</b>                               | 1.29E-03 | <b>Sulphur</b>                | 1.58E+01 |
| <b>Indium</b>                             | 2.74E-05 | <b>Tin</b>                    | 1.24E+02 |
| <b>Iodine</b>                             | 2.74E-04 | <b>Zinc</b>                   | 1.37E+01 |
| <b>Iron</b>                               | 2.56E+02 |                               |          |
| <b>Nonrenewable resources</b>             |          |                               |          |
| <b>Barium sulphate</b>                    | 1.17E+01 | <b>Colemanite ore</b>         | 3.47E+02 |
| <b>Basalt</b>                             | 1.50E+01 | <b>Dolomite</b>               | 2.57E+00 |
| <b>Carbon, in organic matter, in Soil</b> | 3.38E-01 | <b>Fluorspar</b>              | 9.32E+00 |
| <b>Clay</b>                               | 1.76E+03 |                               |          |
| <b>Renewable resources</b>                |          |                               |          |
| <b>Water</b>                              | 2.24E+06 | <b>Carbon dioxide</b>         | 4.67E+03 |

**Table S7** Contents of the discharged waste water after treatment (550kg/m<sup>2</sup>)

| Residues                | Content mg/L | residues        | Content mg/L |
|-------------------------|--------------|-----------------|--------------|
| <b>Pb</b>               | 1            | <b>Anilines</b> | 1            |
| <b>Ag</b>               | 0.5          | <b>P</b>        | 0.1          |
| <b>Cu</b>               | 0.5          | <b>Cl</b>       | 0.5          |
| <b>Phosphate</b>        | 0.5          | <b>HF</b>       | 10           |
| <b>Sulfide</b>          | 1            | <b>COD</b>      | 60           |
| <b>Ammonia nitrogen</b> | 15           | <b>SS</b>       | 20           |
| <b>Cyanide</b>          | 0.5          | <b>BOD5</b>     | 20           |

**Table S8** Treatment of the waste epoxy based PCB

| Waste treatment          | Proportion | Recovery rate(Cu) |                                                                                                                                  |
|--------------------------|------------|-------------------|----------------------------------------------------------------------------------------------------------------------------------|
| <b>Machanical method</b> | 70%        | 95%               | The nonmetal parts can be used as raw materials for other products or just for landfill but we leave out the value of this part. |
| <b>Incineration</b>      | 25%        | 95%               | Calorific value is 7.5mj/kg, electricity generating rate is 24%                                                                  |
| <b>Landfill</b>          | 5%         | 0                 |                                                                                                                                  |

### iii. Environmental profiles for the life cycle of P-PCB

**Table S9** The contribution to the environmental impact categories of different raw materials in P-PCB fabrication

|                       | ADP    | AP     | EP     | FAETP  | GWP    | HTP    | ODP    | POCP   | TETP   |
|-----------------------|--------|--------|--------|--------|--------|--------|--------|--------|--------|
| Paper                 | 51.14% | 38.86% | 45.11% | 30.20% | 47.91% | 11.66% | 67.30% | 52.88% | 40.68% |
| Water                 | 0.01%  | 0.00%  | 0.00%  | 0.00%  | 0.00%  | 0.00%  | 0.00%  | 0.00%  | 0.00%  |
| Electricity mix       | 10.22% | 27.96% | 4.41%  | 4.87%  | 18.09% | 2.65%  | 1.61%  | 14.67% | 2.73%  |
| Ethanol               | 0.83%  | 1.70%  | 2.68%  | 0.89%  | 1.11%  | 0.28%  | 1.29%  | 1.17%  | 1.85%  |
| Methyl Acrylate       | 21.81% | 3.84%  | 3.03%  | 2.39%  | 13.38% | 1.55%  | 12.10% | 9.50%  | 4.02%  |
| Silver                | 0.72%  | 18.97% | 36.62% | 57.94% | 0.75%  | 78.79% | 0.90%  | 9.78%  | 41.32% |
| Formaldehyde          | 0.69%  | 0.10%  | 0.09%  | 0.10%  | 0.29%  | 0.05%  | 0.79%  | 0.20%  | 0.14%  |
| Methyl Acrylate       | 4.75%  | 2.29%  | 0.44%  | 0.18%  | 3.52%  | 0.15%  | 0.02%  | 3.19%  | 0.69%  |
| HNO <sub>3</sub> ,50% | 1.72%  | 2.86%  | 2.88%  | 0.57%  | 6.88%  | 0.65%  | 3.50%  | 1.33%  | 2.44%  |
| Polyester resin       | 7.19%  | 2.86%  | 3.97%  | 2.07%  | 7.33%  | 3.92%  | 11.78% | 6.89%  | 4.49%  |
| NaOH,50%              | 0.92%  | 0.56%  | 0.76%  | 0.79%  | 0.75%  | 0.30%  | 0.72%  | 0.40%  | 1.63%  |

### iv. Environmental profiles for the life cycle of O-PCB

We can see from Table S10 and Figure S10 that the environmental burdens of P-PCB mainly come from raw materials of copper, epoxy resin, glass fiber, water and energy consumption. This is mainly due to the energy intensive and high-emission production processes of copper-clad plate system as well as the large amount of water and electricity consumed in the O-PCB fabrication.

To be specific, life cycle of copper foil contributes the most to AP (45.15%), EP (63.56%), FAETP (89.52%), HTP (84.02%), TETP (85.09%), POCP (38.06%) for the energy consumption and emissions (gas emissions such as CO<sub>2</sub>, SO<sub>2</sub>, NO<sub>2</sub> and waste water emission) in the mining and refining processes of copper;<sup>1</sup> and the electroplating in the O-PCB fabrication consumes large sum of electricity which is responsible for ADP (31.33%), AP (31.39%), GWP (47.51%) and POCP (26.03%). In addition, the epoxy and glass fiber in the substrate of O-PCB have more burdens on environment: the SO<sub>2</sub>, CO<sub>2</sub>, NO<sub>x</sub> and halohydrocarbon discharged in the epoxy production contribute to ADP, GWP and POCP, and thermal treatment processes in the glass fiber production account for ODP, GWP and ADP due to the CO<sub>2</sub> NO<sub>x</sub>, and SO<sub>2</sub> emission and fuel consumption.<sup>2</sup>

Figure S11 shows the picture of a news report which represents the common phenomenon in Guiyu of China that people disassemble the e-wastes manually without any protection. Which is not only harmful to people but also hazardous to the environment.

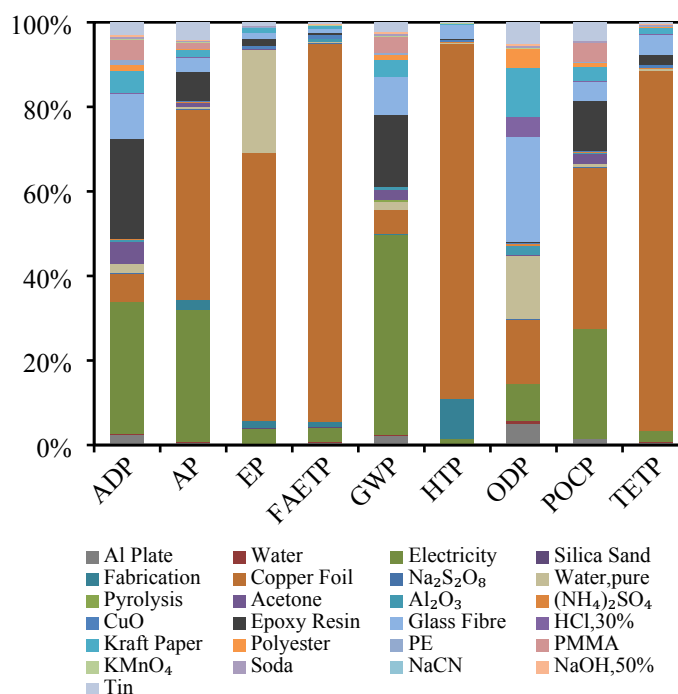

**Figure S10** Environmental profile of O-PCB. The main raw materials and consumptions in the manufacture of epoxy based PCB are listed.

**Table S10** The contribution to the environmental impacts categories of different raw materials of epoxy based PCB

|                                                 | ADP    | AP     | EP     | FAETP  | GWP    | HTP    | ODP    | POCP   | TETP   |
|-------------------------------------------------|--------|--------|--------|--------|--------|--------|--------|--------|--------|
| Copper Foil                                     | 6.66%  | 45.15% | 63.56% | 89.52% | 5.75%  | 84.02% | 15.18% | 38.16% | 85.09% |
| Electricity                                     | 31.33% | 31.39% | 3.59%  | 3.53%  | 47.51% | 1.35%  | 8.69%  | 26.03% | 2.68%  |
| Epoxy Resin                                     | 23.47% | 6.65%  | 1.62%  | 0.30%  | 16.84% | 0.14%  | 0.10%  | 11.88% | 2.33%  |
| Glass Fibre                                     | 10.76% | 3.53%  | 1.38%  | 1.10%  | 8.99%  | 3.34%  | 25.00% | 4.54%  | 4.89%  |
| Water,pure                                      | 2.19%  | 0.49%  | 24.28% | 0.44%  | 1.84%  | 0.10%  | 15.03% | 0.68%  | 0.46%  |
| Water                                           | 0.06%  | 0.01%  | 0.01%  | 0.01%  | 0.04%  | 0.00%  | 0.57%  | 0.02%  | 0.02%  |
| Silica Sand                                     | 0.03%  | 0.00%  | 0.00%  | 0.00%  | 0.02%  | 0.00%  | 0.11%  | 0.01%  | 0.00%  |
| Fabrication                                     | 0.00%  | 2.22%  | 1.62%  | 1.30%  | 0.00%  | 9.54%  | 0.00%  | 0.00%  | 0.00%  |
| Al Plate                                        | 2.55%  | 0.66%  | 0.41%  | 0.67%  | 2.34%  | 0.14%  | 5.15%  | 1.47%  | 0.71%  |
| Na <sub>2</sub> S <sub>2</sub> O <sub>8</sub>   | 0.08%  | 0.05%  | 0.01%  | 0.01%  | 0.06%  | 0.00%  | 0.16%  | 0.05%  | 0.03%  |
| Pyrolysis                                       | 0.00%  | 0.15%  | 0.05%  | 0.00%  | 0.46%  | 0.00%  | 0.00%  | 0.14%  | 0.00%  |
| Acetone                                         | 5.15%  | 0.76%  | 0.12%  | 0.01%  | 2.43%  | 0.01%  | 0.02%  | 2.35%  | 0.12%  |
| Al <sub>2</sub> O <sub>3</sub>                  | 0.62%  | 0.18%  | 0.10%  | 0.64%  | 0.56%  | 0.07%  | 2.24%  | 0.30%  | 0.06%  |
| (NH <sub>4</sub> ) <sub>2</sub> SO <sub>4</sub> | 0.14%  | 0.03%  | 0.01%  | 0.01%  | 0.12%  | 0.01%  | 0.47%  | 0.05%  | 0.05%  |
| CuO                                             | 0.12%  | 0.42%  | 0.69%  | 0.97%  | 0.11%  | 0.69%  | 0.28%  | 0.37%  | 0.70%  |
| HCl,30%                                         | 0.20%  | 0.05%  | 0.04%  | 0.04%  | 0.14%  | 0.01%  | 4.65%  | 0.06%  | 0.11%  |
| Kraft Paper                                     | 5.08%  | 1.77%  | 1.06%  | 0.61%  | 3.85%  | 0.22%  | 11.58% | 3.33%  | 1.54%  |
| Polyester                                       | 1.55%  | 0.23%  | 0.23%  | 0.11%  | 1.36%  | 0.14%  | 4.50%  | 0.86%  | 0.31%  |
| PE                                              | 1.01%  | 0.10%  | 0.01%  | 0.00%  | 0.38%  | 0.00%  | 0.00%  | 0.47%  | 0.00%  |
| PMMA                                            | 4.94%  | 1.46%  | 0.18%  | 0.03%  | 3.89%  | 0.02%  | 0.05%  | 4.50%  | 0.07%  |
| KMnO <sub>4</sub>                               | 0.14%  | 0.03%  | 0.03%  | 0.02%  | 0.11%  | 0.01%  | 0.25%  | 0.04%  | 0.04%  |
| Soda                                            | 0.53%  | 0.37%  | 0.15%  | 0.11%  | 0.60%  | 0.05%  | 0.47%  | 0.29%  | 0.22%  |
| NaCN                                            | 0.01%  | 0.00%  | 0.00%  | 0.00%  | 0.01%  | 0.00%  | 0.00%  | 0.00%  | 0.00%  |
| NaOH,50%                                        | 0.35%  | 0.08%  | 0.08%  | 0.07%  | 0.25%  | 0.02%  | 0.49%  | 0.09%  | 0.20%  |
| Tin                                             | 3.03%  | 4.22%  | 0.75%  | 0.47%  | 2.34%  | 0.10%  | 5.00%  | 4.31%  | 0.36%  |

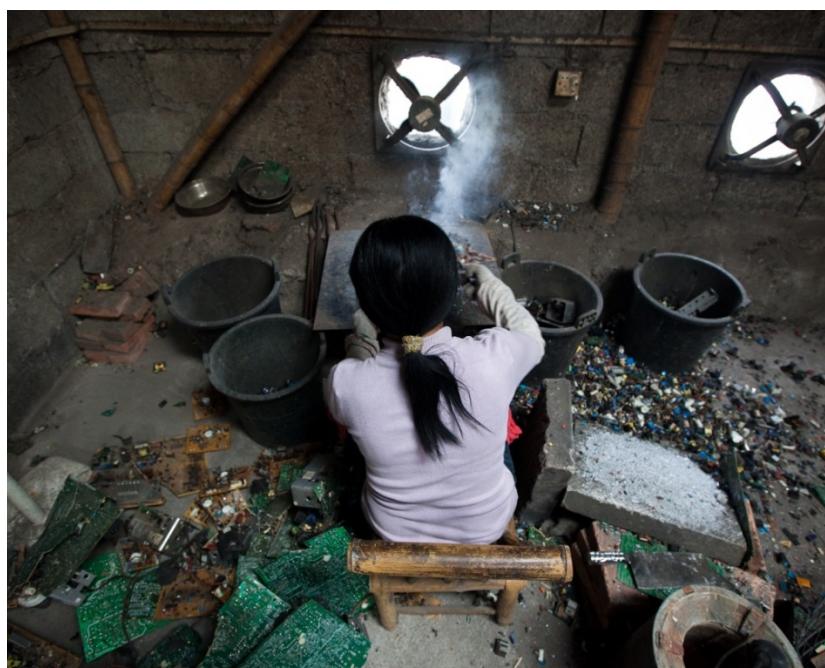

**Figure S11** A Chinese woman manually heated up a computer main board to remove chips. 2010, Guiyu, China. (Copyright: Jeffrey Lau/IPS)

#### v. Cost estimation of the paper based PCB.

The production cost of the paper based PCB is roughly calculated as following.

**Table S11** Paper based PCB(4 layers&10000m<sup>2</sup>) production cost estimation.

| Items                            | Details                               | Material consumption | Price/USD          | Cost for 10000 m <sup>2</sup> P-PCB/USD |
|----------------------------------|---------------------------------------|----------------------|--------------------|-----------------------------------------|
| <b>Raw Materials<sup>a</sup></b> | Paper base(with adhesive on the back) | 4000m <sup>2</sup>   | 1.9/m <sup>2</sup> | 7600                                    |
|                                  | PU resin                              | 103kg                | 40/kg              | 4120                                    |
|                                  | Silver flakes                         | 103kg                | 560/kg             | 57680                                   |
| <b>Energy<sup>b</sup></b>        | For processing                        | 2670kWh              | 0.144/kWh          | 384.48                                  |
| <b>Others<sup>c</sup></b>        | -                                     |                      | 0.1/m <sup>2</sup> | 1000                                    |
| <b>Total</b>                     | -                                     |                      | -                  | 70784.48                                |

- We take the 4-layer P-PCB as example for the estimation and set the costs by reference to the material price on Alibaba ([www.1688.com](http://www.1688.com)).
- The detail information of energy consumption is shown in table S2.
- This item includes costs of labour, workshop machine wear and consumable items in the fabrication process.

The costs estimated in table S is based on the information we take into consideration in the LCA study, and we just roughly caculated the costs of raw materials and consumptions in the fabrication process. The result shows that the costs for 4-layer P-PCB is about 7 USD/m<sup>2</sup>. However, this result can't represent all of the costs of the P-PCB, such as costs of designation, patent fee or other necessary costs in a mass production scenario. So we estimate the costs of the P-PCB as 15-30 USD/m<sup>2</sup> to make it reasonable.



**Reference:**

1. R. U. Ayres, L. Ayres and I. Råde, *The life cycle of copper, its co-products and by-products*, Springer, 2011.
2. T. Corbière-Nicollier, B. Gfeller Laban, L. Lundquist, Y. Leterrier, J.-A. Manson and O. Jolliet, *Resources, Conservation and Recycling*, 2001, **33**, 267-287.
